# Supplementary material
Source: publisher figshare collection journal article supplement (https://acs.figshare.com/ndownloader/files/23828201)
Supplement: Supplementary file 1 [file 23828201]

# In-Depth Cannabis Multiclass Metabolite Profiling Using Sorptive Extraction and Multidimensional Gas Chromatography with Low- and High-Resolution Mass Spectrometry

Flavio A. Franchina<sup>1\*</sup>, Lena M. Dubois<sup>1</sup>, and Jean-François Focant<sup>1</sup>

<sup>1</sup>University of Liège, Molecular Systems, Organic & Biological Analytical Chemistry Group, 11 Allée du Six Août, 4000 Liège, Belgium.

\*flaviofranchina@gmail.com, ffranchina@uliege.be

## Table of content

**Supplementary Table S1:** Chemical class, compound name, CAS number (CAS#) and experimental retention index (RI<sub>exp</sub>) of the 27 chemical standards used for chemical class elution classification in the GC×GC system and method validation.

**Supplementary Table S2:** Relative standard deviation (RSD%) of the chemical classes of interest in the quality control sample under the final SBSE conditions. For the characteristics ions used for measuring the response, refer to Table 2 in the main text.

**Supplementary Table S3:** Qualitative information (MS library similarity (MS lib. match) and experimental retention index (RI<sub>exp</sub>)) of the compounds reported in Figure 5. For the retention index search, the tolerance was set to ±20 units. When a reference retention index was not available and high MS similarity (>800) was obtained, the MS library hit is reported.

**Supplementary Table S4:** Repeatability and inlet conversion yields (5 replicates) of the acid CBD-A and THC-A to the neutral forms CBD and THC.

**Supplementary Table S5:** Quantitative information and chemotyping of the sample analyzed. Quantitative values were obtained from 3 replicates and are expressed in w/w %.

**Supplementary Figure S1:** The 2D plot expansion of the cannabinoids elution zone (sample 7) highlighting the selectivity of GC×GC. I) Separation between chromatographic artifacts (i.e. column bleed) and analytes of interest. II) Resolution of analyte pairs (arrows) which would co-elute in conventional 1D GC.

**Supplementary Figure S2:** Comparison of flow-modulated GC×GC (lower) and unmodulated GC (upper) traces showing the difference in response magnitude (sesquiterpenes elution zone of sample 8).

**Supplementary Figure S3:** Workflow of data treatment for the cannabis inflorescences analysis.

**Supplementary Figure S4:** PC scores plot of the selected 70 features from the cannabis inflorescences. Features were selected amongst the most statistically significant ones (Kruskal-Wallis,  $p > 0.05$ ), and more expressed at least in one of the sample type. Ellipses represent the 95% confidence interval for each group.

**Supplementary Figure S5A-D:** High-resolution mass spectra ( $\geq 25,000$  fwhm) of chlorothalonil (A), cyprodinil (B), bisphenol G (C), and HU-331 (D).

**Supplementary Table S1.** Chemical class, compound name, CAS number (CAS#) and experimental retention index (RI<sub>exp</sub>) of the 27 chemical standards used for chemical class elution classification in the GC×GC system and method validation.

| Chemical class | Name                                               | CAS#       | RI <sub>exp</sub> |
|----------------|----------------------------------------------------|------------|-------------------|
| Cannabinoids   | Cannabidiol (CBD)                                  | 13956-29-1 | 2452              |
|                | Cannabidiolic Acid (CBD-A)*                        | 1244-58-2  | -                 |
|                | $\Delta^9$ -tetrahydrocannabinol (THC)             | 972-08-3   | 2552              |
|                | $\Delta^9$ -tetrahydrocannabinolic acid A (THC-A)* | 23978-85-0 | -                 |
|                | Cannabinol (CBN)                                   | 521-35-7   | 2623              |
| Monoterpenes   | $\alpha$ -pinene                                   | 80-56-8    | 933               |
|                | Camphene                                           | 79-92-5    | 950               |
|                | $\beta$ -pinene                                    | 18172-67-3 | 976               |
|                | $\beta$ -myrcene                                   | 123-35-3   | 984               |
|                | $\delta$ -3-carene                                 | 13466-78-9 | 1009              |
|                | $\alpha$ -terpinene                                | 99-86-5    | 1017              |
|                | <i>p</i> -cymene                                   | 99-87-6    | 1028              |
|                | Limonene                                           | 5989-27-5  | 1026              |
|                | Eucalyptol                                         | 470-82-6   | 1033              |
|                | Ocimene                                            | 13877-91-3 | 1049              |
|                | $\gamma$ -terpinene                                | 99-85-4    | 1060              |
|                | Terpinolene                                        | 586-62-9   | 1088              |
|                | Linalool                                           | 78-70-6    | 1099              |
|                | Isopulegol                                         | 89-79-2    | 1146              |
|                | Geraniol                                           | 106-24-1   | 1255              |
| Sesquiterpenes | $\beta$ -caryophyllene                             | 87-44-5    | 1423              |
|                | $\alpha$ -humulene                                 | 6753-98-6  | 1461              |
|                | Nerolidol (cis- isomer)                            | 3790-78-1  | 1544              |
|                | Nerolidol (trans- isomer)                          | 35944-21-9 | 1564              |
|                | Caryophyllene oxide                                | 1139-30-6  | 1593              |
|                | Guaial                                             | 489-86-1   | 1608              |
|                | $\alpha$ -bisabolol                                | 23089-26-1 | 1695              |

\*Subjected to decarboxylation at the GC inlet into the corresponding neutral form

**Supplementary Table S2.** Relative standard deviation (RSD%) of the chemical classes of interest in the quality control sample under the final SBSE conditions. For the characteristics ions used for measuring the response, refer to Table 2 in the main text.

| Classes                            | RSD% (n=8) |
|------------------------------------|------------|
| Monoterpenes                       | 18.0       |
| Sesquiterpenes                     | 7.0        |
| IS (d <sub>5</sub> -chlorobenzene) | 11.6       |
| Hydrocarbons                       | 13.2       |
| Terpenoid alcohols and fatty acids | 11.8       |
| Cannabinoids                       | 18.3       |

**Supplementary Table S3.** Qualitative information (MS library similarity (MS lib. match) and experimental retention index ( $RI_{exp}$ )) of the compounds reported in Figure 5. For the retention index search, the tolerance was set to  $\pm 20$  units. When a reference retention index was not available and high MS similarity ( $>800$ ) was obtained, the MS library hit is reported.

| Label               | Tentative ID                                                    | MS lib.<br>match* | $RI_{exp}$ # |
|---------------------|-----------------------------------------------------------------|-------------------|--------------|
| Mono.1              | $\alpha$ -thujene                                               | 877               | 930          |
| Mono.2*             | $\alpha$ -pinene*                                               | 898               | 938          |
| Mono.3              | Sabinene                                                        | 790               | 987          |
| Mono.4*             | $\beta$ -myrcene*                                               | 882               | 989          |
| Mono.5              | $\alpha$ -phellandrene                                          | 816               | 1012         |
| Mono.6*             | Eucalyptol*                                                     | 878               | 1037         |
| Mono.7              | $\alpha$ -ocimene                                               | 891               | 1055         |
| Mono.8*             | $\gamma$ -terpinene*                                            | 880               | 1068         |
| Mono.9              | Fenchone                                                        | 840               | 1098         |
| Mono.10             | Trans-limonene oxide                                            | 740               | 1131         |
| Mono.11             | Monoterpene - unidentified                                      | 798               | 1152         |
| Mono.12             | Monoterpene - unidentified                                      | 706               | 1158         |
| Mono.13             | Terpinen-4-ol                                                   | 865               | 1187         |
| Mono.14             | p-cymen-8-ol                                                    | 792               | 1192         |
| Mono.15             | Fenchyl acetate                                                 | 754               | 1231         |
| Mono.16             | Monoterpene - unidentified                                      | -                 | 1321         |
| Sesqui.1            | $\alpha$ -copaene                                               | 761               | 1373         |
| Sesqui.2            | Ylangene                                                        | 881               | 1385         |
| Sesqui.3            | $\gamma$ -elemene                                               | 710               | 1444         |
| Sesqui.4            | Alloaromadendrene                                               | 829               | 1467         |
| Sesqui.5            | Sesquiterpene - unidentified                                    | -                 | 1471         |
| Sesqui.6            | Sesquiterpene - unidentified                                    | -                 | 1473         |
| Sesqui.7            | Sesquiterpene - unidentified                                    | -                 | 1540         |
| Sesqui.8            | $\alpha$ -calacorene                                            | 884               | 1563         |
| Sesqui.9*           | Nerolidol*                                                      | 901               | 1569         |
| Sesqui.10           | Sesquiterpene - unidentified                                    | -                 | 1576         |
| Sesqui.11*          | Caryophyllene oxide*                                            | 894               | 1599         |
| Sesqui.12           | Sesquiterpene - unidentified                                    | 822               | 1681         |
| Sesqui.13           | Sesquiterpene - unidentified                                    | -                 | 1689         |
| Sesqui.14           | Sesquiterpene - unidentified                                    | -                 | 1737         |
| Terp.alc.-fat.ac.1  | Fat.ac. ester - unidentified                                    | -                 | 1795         |
| Terp.alc.-fat.ac.2  | Benzoic acid, 2-methylbutyl ester                               | 800               | 1796         |
| Terp.alc.-fat.ac.3  | Fat.ac. ester - unidentified                                    | -                 | 1826         |
| Terp.alc.-fat.ac.4  | Ester (benzoic acid, hept-3-yl ester) <sup>o</sup>              | 803               | 1832         |
| Terp.alc.-fat.ac.5  | Ketone (ketone, methyl 2,2,3-trimethylcyclopentyl) <sup>o</sup> | 801               | 1895         |
| Terp.alc.-fat.ac.6  | Neophytadiene                                                   | 839               | 1886         |
| Terp.alc.-fat.ac.7  | Unknown                                                         | -                 | 1903         |
| Terp.alc.-fat.ac.8  | Fat.ac. ester - unidentified                                    | -                 | 1991         |
| Terp.alc.-fat.ac.9  | Fat.ac. ester - unidentified                                    | -                 | 1998         |
| Terp.alc.-fat.ac.10 | Fat.ac. ester - unidentified                                    | -                 | 2094         |
| Terp.alc.-fat.ac.11 | Phytol                                                          | 893               | 2095         |

## Supplementary Information

|                     |                                                                           |     |      |
|---------------------|---------------------------------------------------------------------------|-----|------|
| Terp.alc.-fat.ac.12 | 9-octadecenoic acid, methyl ester                                         | 911 | 2108 |
| Terp.alc.-fat.ac.13 | Fat.ac. ester - unidentified                                              | -   | 2185 |
| Terp.alc.-fat.ac.14 | Isoamyl laurate                                                           | 838 | 2251 |
| Terp.alc.-fat.ac.15 | Fat.ac. ester (stearic acid, 2-hydroxy-1-methylpropyl ester) <sup>°</sup> | 802 | 2312 |
| Terp.alc.-fat.ac.16 | Fat.ac. ester (9,12,15-octadecatrienoic acid, methyl ester) <sup>°</sup>  | 853 | 2440 |
| Terp.alc.-fat.ac.17 | Fat.ac. ester (octadecanoic acid, 3-hydroxy-, methyl ester) <sup>°</sup>  | 814 | 2490 |
| Terp.alc.-fat.ac.18 | Fat.ac. ester (decanoic acid, octyl ester) <sup>°</sup>                   | 800 | 2576 |
| Hydrocarbon.1       | Hydrocarbon (decane, 6-ethyl-2-methyl-) <sup>°</sup>                      | 834 | 1146 |
| Hydrocarbon.2       | Hydrocarbon (hexane, 3-ethyl-2,5-dimethyl-) <sup>°</sup>                  | 853 | 1157 |
| Cannabinoid.1       | Cannabidivarol <sup>°</sup>                                               | 842 | 2245 |
| Cannabinoid.2       | Cannabinoid (cannabichromene) <sup>°</sup>                                | 904 | 2487 |
| Cannabinoid.3       | Cannabinoid (cannabichromene) <sup>°</sup>                                | 897 | 2669 |
| Cannabinoid.4       | Cannabinoid (11-hydroxy- $\Delta^9$ -tetrahydrocannabinol) <sup>°</sup>   | 708 | 2666 |
| Cannabinoid.5       | Cannabinoid (cannabichromene) <sup>°</sup>                                | 848 | 2367 |
| Cannabinoid.6       | Cannabinoid analogue ( $\Delta^8$ -tetrahydrocannabinol) <sup>°</sup>     | 810 | 2497 |
| Cannabinoid.7       | Cannabinoid analogue ( $\Delta^9$ - tetrahydrocannabinol) <sup>°</sup>    | 845 | 2556 |
| Unclassified.1      | Alcohol (2,4,4-Trimethyl-1-pentanol) <sup>°</sup>                         | 807 | 1358 |
| Unclassified.2      | Ester (2-furanmethanol, tetrahydro-, acetate) <sup>°</sup>                | 805 | 1605 |
| Unclassified.3      | Unknown                                                                   | -   | 1812 |
| Unclassified.4      | Hexadecanal                                                               | 899 | 1823 |
| Unclassified.5      | Unknown                                                                   | -   | 1847 |
| Unclassified.6      | Unknown                                                                   | -   | 1761 |
| Unclassified.7      | Unknown                                                                   | -   | 2409 |
| Unclassified.8      | Unknown                                                                   | -   | 2429 |
| Unclassified.9      | Unknown                                                                   | -   | 2584 |
| Unclassified.10     | Ester (phenethyl tetradecanoate) <sup>°</sup>                             | 919 | 2693 |
| Unclassified.11     | 2-phenylethy linoleate                                                    | 831 | 2878 |
| Unclassified.12     | Unknown                                                                   | -   | 2951 |
| Unclassified.13     | Unknown                                                                   | -   | 3132 |

<sup>°</sup> Confirmed with analytical-grade standards

<sup>°</sup> Library hit (>800 MS match) for compounds where the reference retention index was not available

**Supplementary Table S4.** Repeatability and inlet conversion yields (5 replicates) of the acid CBD-A and THC-A to the neutral forms CBD and THC.

|       | Repeatability*<br>(RSD%) | Conversion<br>yield |
|-------|--------------------------|---------------------|
| CBD   | 5.8                      | -                   |
| CBD-A | 15.3                     | 61% <sup>#</sup>    |
| THC   | 4.3                      | -                   |
| THC-A | 10.2                     | 56% <sup>°</sup>    |

\* Spiking 1 µL of the standard (100 µg/mL) on the SBSE

<sup>#</sup> Calculated using:  $\frac{\text{response CBD} - A \text{ spike}}{\text{response CBD spike}} \times 100$ <sup>°</sup> Calculated using:  $\frac{\text{response THC} - A \text{ spike}}{\text{response THC spike}} \times 100$ **Supplementary Table S5.** Quantitative information and chemotyping of the analyzed samples. Quantitative values were obtained from 3 replicates and are expressed in w/w%.

|          | Total CBD    | Total THC    | CBN          | Chemotype*   | Terpene dominance <sup>#</sup>     |
|----------|--------------|--------------|--------------|--------------|------------------------------------|
| Sample 1 | 1.80 ± 0.077 | 0.08 ± 0.008 | 0.03 ± 0.007 | CBD-dominant | β-myrcene/β-caryophyllene          |
| Sample 2 | 1.92 ± 0.120 | 0.07 ± 0.010 | 0.02 ± 0.003 | CBD-dominant | β-caryophyllene                    |
| Sample 3 | 1.50 ± 0.053 | 0.06 ± 0.002 | < 0.02       | CBD-dominant | β-caryophyllene                    |
| Sample 4 | 1.91 ± 0.042 | 0.07 ± 0.002 | 0.02 ± 0.002 | CBD-dominant | β-myrcene/Limonene/β-caryophyllene |
| Sample 5 | 2.07 ± 0.130 | 0.08 ± 0.003 | 0.02 ± 0.001 | CBD-dominant | β-myrcene/Limonene/β-caryophyllene |
| Sample 6 | 1.75 ± 0.150 | 0.07 ± 0.006 | 0.02 ± 0.005 | CBD-dominant | β-myrcene/Limonene/β-caryophyllene |
| Sample 7 | 5.53 ± 0.190 | 0.12 ± 0.009 | 0.07 ± 0.012 | CBD-dominant | Limonene/β-caryophyllene           |
| Sample 8 | 7.94 ± 0.076 | 0.18 ± 0.007 | 0.01 ± 0.003 | CBD-dominant | Limonene/β-caryophyllene           |

\* based on ref. 22 in the main text

<sup>#</sup> tentative subclassification calculated using the response (TIC) of the selected terpene and the total response of the mono and sesquiterpene elution regions. The obtained values were then compared with the guidelines reported in ref. 22 in the main text

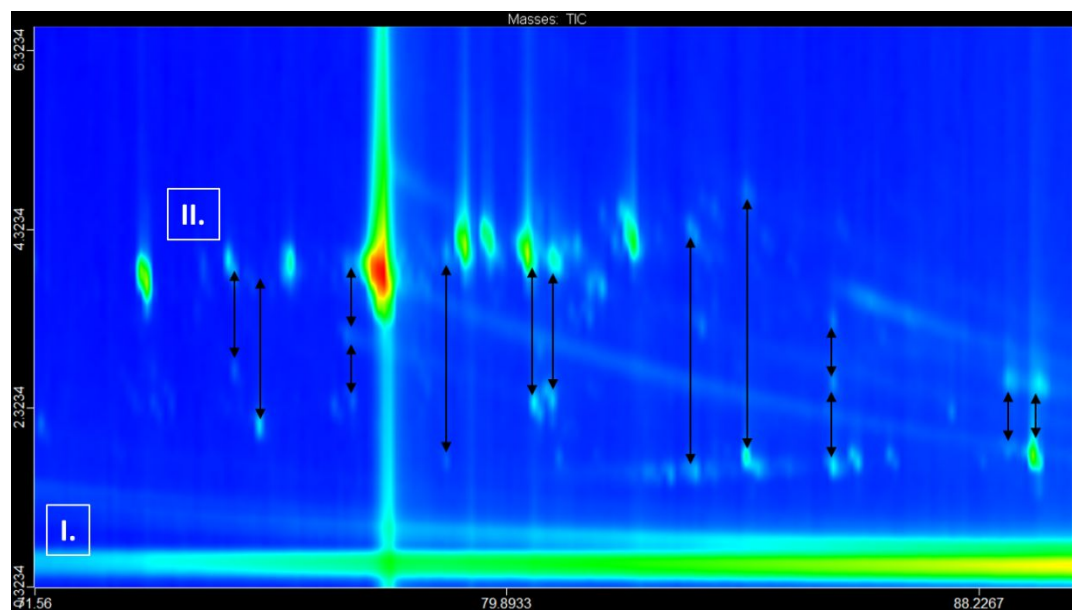

**Supplementary Figure S1:** The 2D chromatogram expansion of the cannabinoids elution zone (sample 7) highlighting the selectivity of GC×GC. I) Separation between chromatographic artifacts (*i.e.*, column bleed) and analytes of interest. II) Resolution of analyte pairs (arrows) which would co-elute in conventional 1D GC.

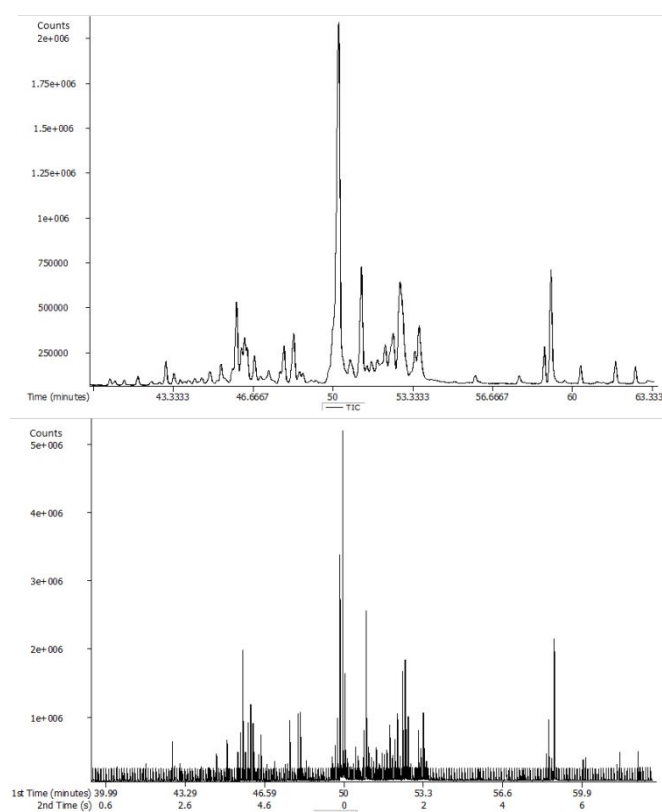

**Supplementary Figure S2:** Comparison of flow-modulated GC×GC (lower) and unmodulated GC (upper) traces showing the difference in response magnitude (sesquiterpenes elution zone of sample 8).

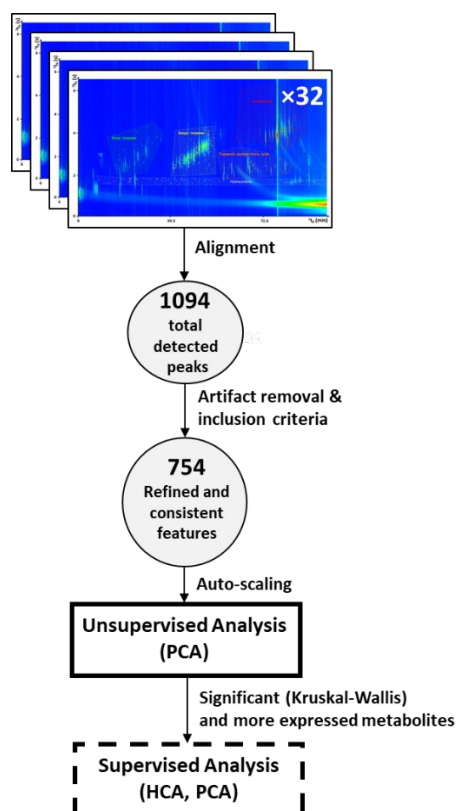

**Supplementary Figure S3:** Workflow of data treatment for the cannabis inflorescences analysis.

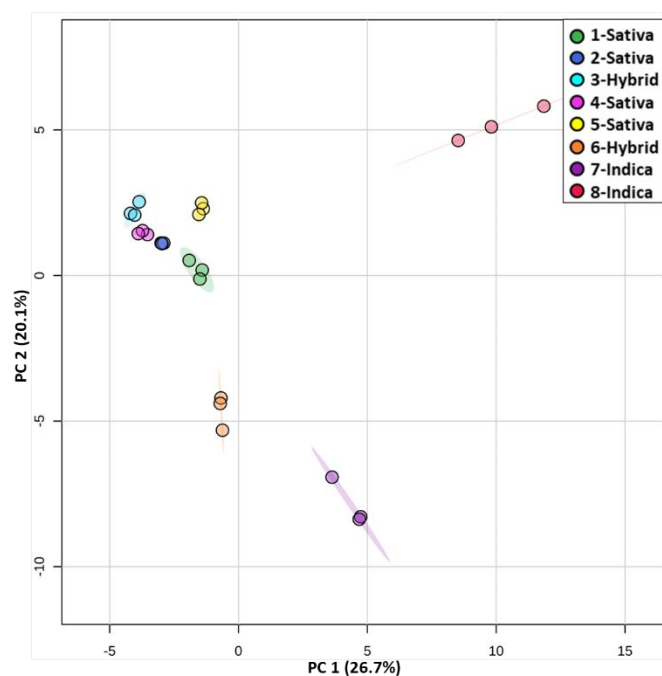

**Supplementary Figure S4:** PC scores plot of the selected 70 features from the cannabis inflorescences. Features were selected amongst the most statistically significant ones (Kruskal-Wallis,  $p > 0.05$ ), and more expressed at least in one of the sample type. Ellipses represent the 95% confidence interval for each group.



## Supplementary Information

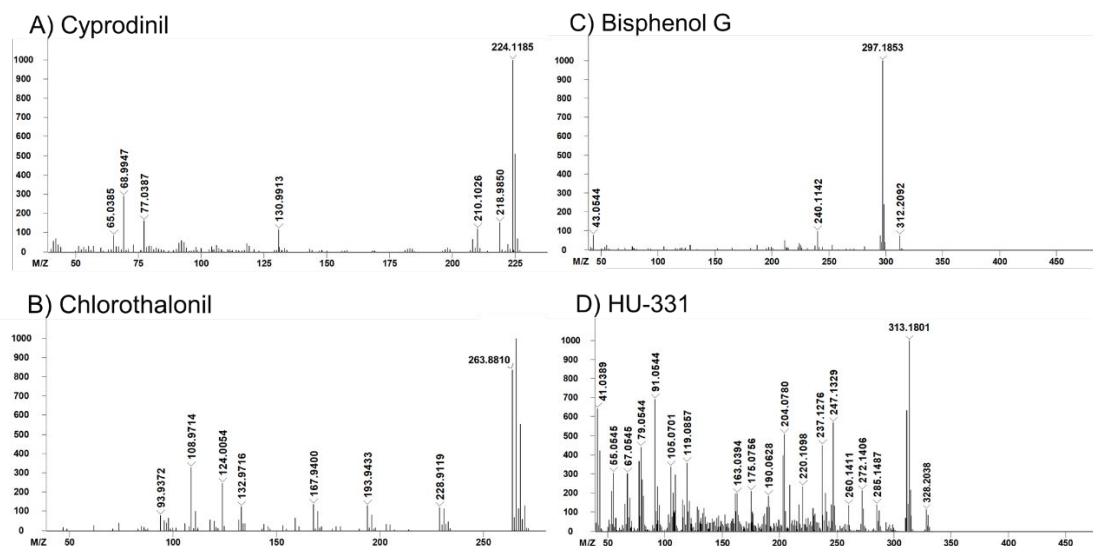

**Supplementary Figure S5A-D:** High-resolution mass spectra ( $\geq 25,000$  fwhm) of chlorothalonil (A), cyprodinil (B), bisphenol G (C), and HU-331 (D).
